# Supplementary material for: Pharmacogenetic Guided Opioid Therapy Improves Chronic Pain Outcomes and Comorbid Mental Health: A Randomized, Double-Blind, Controlled Study
Source: MDPI journal article supplement (doi:10.3390/ijms241310754), 2023-06-28
Supplement: s1 [file s1]

## SUPPLEMENTARY MATERIAL

**Table S1:** *CYP2D6* phenotype impact in opioid pharmacology outcomes. Adapted from Ballester et al., 2022 [39].

|          | Metabolism                         | Major findings                                                                                                                                                                                                                                                                                                                                               | References                                                                                                 |
|----------|------------------------------------|--------------------------------------------------------------------------------------------------------------------------------------------------------------------------------------------------------------------------------------------------------------------------------------------------------------------------------------------------------------|------------------------------------------------------------------------------------------------------------|
| TRAMADOL | Dose adjustment                    | <i>CYP2D6</i> UMs and PMs guided prescribing improves analgesia, 24% of <i>CYP2D6</i> -dose guided vs. 0% non-guided reported $\geq 30\%$ (clinically meaningful) reduction in the pain measurement                                                                                                                                                          | Smith et al., 2019 [50]                                                                                    |
|          | Major doses                        | The consumption of tramadol in <i>CYP2D6</i> *10/*10 group was significantly higher than that in <i>CYP2D6</i> *1/*1 or <i>CYP2D6</i> *1/*10 ( $P < 0.05$ )                                                                                                                                                                                                  | Dong et al., 2015 [51]                                                                                     |
|          | Decreased metabolism               | <i>CYP2D6</i> UMs and PMs phenotypes are associated with a reduction of the O-desmethylation process compared to EMs                                                                                                                                                                                                                                         | Bastami et al., 2014 [52]<br>Lane et al., 2014 [53]<br>Haage et al., 2018 [54]<br>Tanaka et al., 2018 [55] |
|          | Decreased metabolism               | <i>CYP2D6</i> *4 or *10 have a decreased excretion of O-desmethyltramadol.                                                                                                                                                                                                                                                                                   | Arafa et al., 2018 [56]                                                                                    |
|          | Decreased metabolism               | Decreased ratios of O-desmethyltramadol/tramadol ratio and N,O-desmethyltramadol/N-desmethyltramadol in <i>CYP2D6</i> *5/*5 and *10/*10                                                                                                                                                                                                                      | Yu et al., 2018 [57]<br>Yu et al., 2018 [58]                                                               |
|          | Increased metabolism               | N-desmethyltramadol/O-desmethyltramadol concentration ratios are increased in PM genotype                                                                                                                                                                                                                                                                    | Fonseca et al., 2016 [59]                                                                                  |
|          | Increased metabolism               | <i>CYP2D6</i> *10/*10 is associated with increased formation of N-desmethyltramadol from tramadol ( $p < 0.05$ )                                                                                                                                                                                                                                             | Yu et al., 2018 [57]                                                                                       |
|          | Increased metabolism               | <i>CYP2D6</i> UMs and PMs phenotypes are associated with an increase of the N-desmethylation process compared to EM                                                                                                                                                                                                                                          | Haage et al., 2018 [54]<br>Tanaka et al., 2018 [55]                                                        |
|          | Decreased and Increased metabolism | The plasma concentration of O-desmethyltramadol and its ratio to tramadol were lower in the <i>CYP2D6</i> IMs + PMs group than in NM group ( $P = 0.002$ and $P = 0.023$ ). The plasma concentration of N-desmethyltramadol and its ratio to tramadol were higher in the <i>CYP2D6</i> IMs + PMs group than in the NMs group ( $P = 0.001$ and $P = 0.001$ ) | Tanaka et al., 2018 [55]                                                                                   |
|          | Equal metabolism                   | No statistical difference of tramadol concentrations between phenotypes                                                                                                                                                                                                                                                                                      | Bastami et al., 2014 [52]<br>Tanaka et al., 2018 [55]                                                      |
|          | Increased side-effects             | <i>CYP2D6</i> PMs increased frequency of tramadol-induced AEs                                                                                                                                                                                                                                                                                                | Elkalioubie et al., 2011 [30]<br>Orliaguet et al., 2015 [29]                                               |
|          | Major side-effects                 | In carriers of *9/*9, *5/*5, *5/*4, and *10/*10, also in 4 allele polymorphisms (*4/*1 [38.4%] and *4/*4 [42.8%])                                                                                                                                                                                                                                            | Batiskayi et al., 2020 [60]                                                                                |
|          | Decreased side-effects             | <i>CYP2D6</i> *4 or *10 alleles are associated with decreased severity of tramadol-induced hepatotoxicity $p < 0.05$                                                                                                                                                                                                                                         | Arafa et al., 2018 [56]                                                                                    |

OXYCODONE

|                                 |                                                                                                                                                                                                                                                                                                       |                                                                                      |
|---------------------------------|-------------------------------------------------------------------------------------------------------------------------------------------------------------------------------------------------------------------------------------------------------------------------------------------------------|--------------------------------------------------------------------------------------|
| Dose adjustment                 | <i>CYP2D6</i> UMs and PMs guided prescribing improves analgesia                                                                                                                                                                                                                                       | Linares et al., 2014 [28]                                                            |
| Major efficacy and side effects | <i>CYP2D6</i> *6 and *9 carriers had a reduced (*9) or absent (*6) cytochrome activity, and therapeutic failure, and <i>CYP2D6</i> UMs showed an increased risk of side effects. Plus, <i>CYP2D6</i> *1/*11, *4/*6 and *41/* 2N showed higher efficacy and side effects when chronic opioid treatment | Dagostino et al., 2018 [61]                                                          |
| Equal doses                     | <i>CYP2D6</i> PMs and EMs no statistical differences of oxycodone doses                                                                                                                                                                                                                               | Naito et al., 2011 [62]                                                              |
| Reduced metabolism              | <i>CYP2D6</i> PMs genotypes are associated with decreased exposure to oxymorphone and noroxymorphone                                                                                                                                                                                                  | Stamer et al., 2013 [63]<br>Andreassen et al., 2012 [64]<br>Balyan et al., 2017 [65] |
| Equal metabolism                | No statistical differences of oxycodone concentrations                                                                                                                                                                                                                                                | Naito et al., 2011 [62]<br>Andreassen et al., 2012 [64]<br>Balyan et al., 2017 [65]  |
| Equal side-effects              | No statistical differences of opioid-induced AEs                                                                                                                                                                                                                                                      | Andreassen et al., 2012 [64]                                                         |
| Equal side-effects              | <i>CYP2D6</i> PMs and EMs no statistical differences of incidence of AEs                                                                                                                                                                                                                              | Andreassen et al., 2012 [64]<br>Slanar et al., 2012 [66]                             |

**Table S2.** Cytochrome p450 drug interaction. analgesics, antidepressants and anxiolytics involved in *CYP2D6* metabolism.

| <b>Inductors</b> | <b>Inhibitors</b> | <b>Substrate</b>  |
|------------------|-------------------|-------------------|
| Dexamethasone    | Celecoxib         | Oxycodone         |
| Oritavancine     | Methadone         | Tramadol          |
| Rifampicine      | Doxepina          | Codeine           |
|                  | Escitalopram      | Escitalopram      |
|                  | Citalopram        | Citalopram        |
|                  | Duloxetine        | Atomoxetine       |
|                  | Paroxetine        | Duloxetine        |
|                  | Sertralina        | Paroxetine        |
|                  | Bupropion         | Fluoxetine        |
|                  | Clomipramina      | Venlafaxine       |
|                  | Clobazam          | Doxepine          |
|                  | Clorpromazine     | Nortriptyline     |
|                  | Haloperidol       | Imipramine        |
|                  | Cocaine           | Fluvoxamine       |
|                  |                   | Amitriptyline     |
|                  |                   | Clomipramina      |
|                  |                   | Desipramine       |
|                  |                   | Metoxi anfetamine |
|                  |                   | Clorpromazina     |
|                  |                   | Lidocaine         |
|                  |                   | Clonidina         |
|                  |                   | Haloperidol       |
|                  |                   | Risperidone       |
|                  |                   | Dextromethorphan  |
|                  |                   | Amphetamine       |
